# Supplementary material
Source: PubMed Central journal article supplement (PMC4304894)

Figure S1A

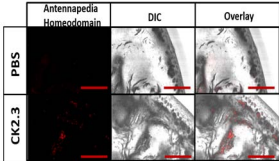

Figure S1B

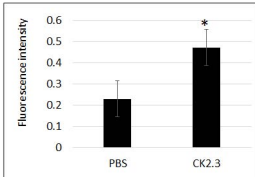

Figure S2A

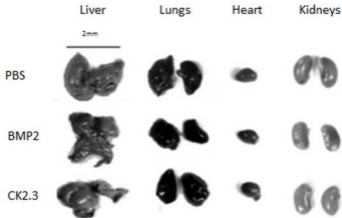

Figure S2B

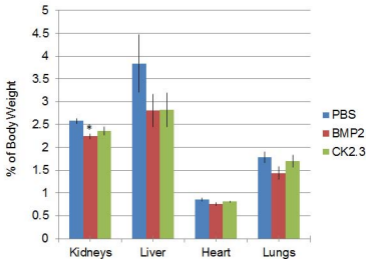

Supplement: NIHMS630532-supplement-Supp_FigureS1-S2.pdf [file NIHMS630532-supplement-Supp_FigureS1-S2.pdf]
